# Supplementary material for: State-to-State Variation in SSI Enrollment for Children With Mental Disabilities: An Administrative and Ethical Challenge
Source: Atypon-hosted journal article supplement (doi:10.1176/appi.ps.201600118), 2016-10-03

## **Supplemental Appendix**

The source of these figures is The National Academies of Sciences, Engineering, and Medicine (2015) report, Mental disorders and disabilities among low-income children. Washington, DC: The National Academies Press. [Reproduced here with permission.]

**Figure 1.** Rates of SSI child initial determinations for 10 select mental impairments, by state: fiscal year 2013 (per 100,000 children in families with income less than 200 percent of the federal poverty level).

**Figure 2.** Rates of the SSI child initial determinations for 10 select mental impairments, by state: fiscal year 2013 (per 100,000 children in families with income less than 200 percent of the federal poverty level).  
SOURCES: U.S. Census Bureau, 2015; unpublished data set provided by the SSA.

**Figure 3.** Child SSI initial allowance rate for 10 selected mental impairments, by disability determination service: fiscal year 2013 (percentage). SOURCE: Unpublished data set provided by the SSA.

**Figure 4.** Percentages of children in low-income households in each state who are recipients of SSI benefits for the 10 selected mental disorders.  
SOURCE: Unpublished data set provided by the SSA.

**Figure 5.** Numbers of recipients for the 10 selected mental disorders in 2013, by state. SOURCE: Unpublished data set provided by the SSA.  
SOURCES: U.S. Census Bureau, 2015; unpublished data set provided by the SSA.

**Figure 6.** Percent change in rate of determinations among children in households below 200 percent of the federal poverty level, by state, from 2004 to 2013.

See figures below.

**Figure 1.** Rates of SSI child initial determinations for 10 select mental impairments, by state: fiscal year 2013 (per 100,000 children in families with income less than 200 percent of the federal poverty level).

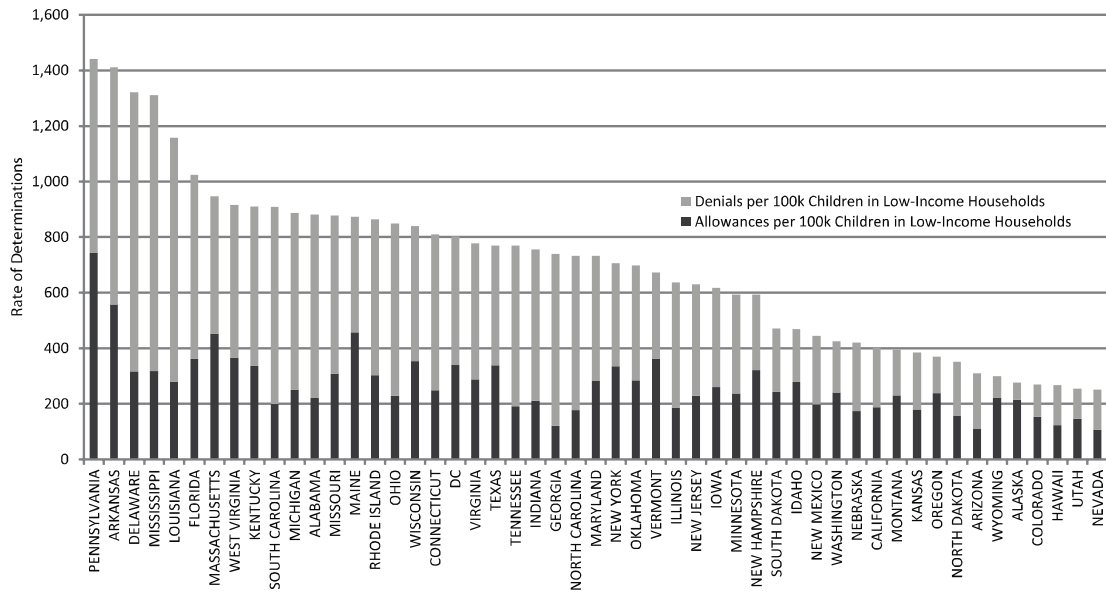



**Figure 3.** Child SSI initial allowance rate for 10 selected mental impairments, by disability determination service: fiscal year 2013 (percentage). SOURCE: Unpublished data set provided by the SSA.

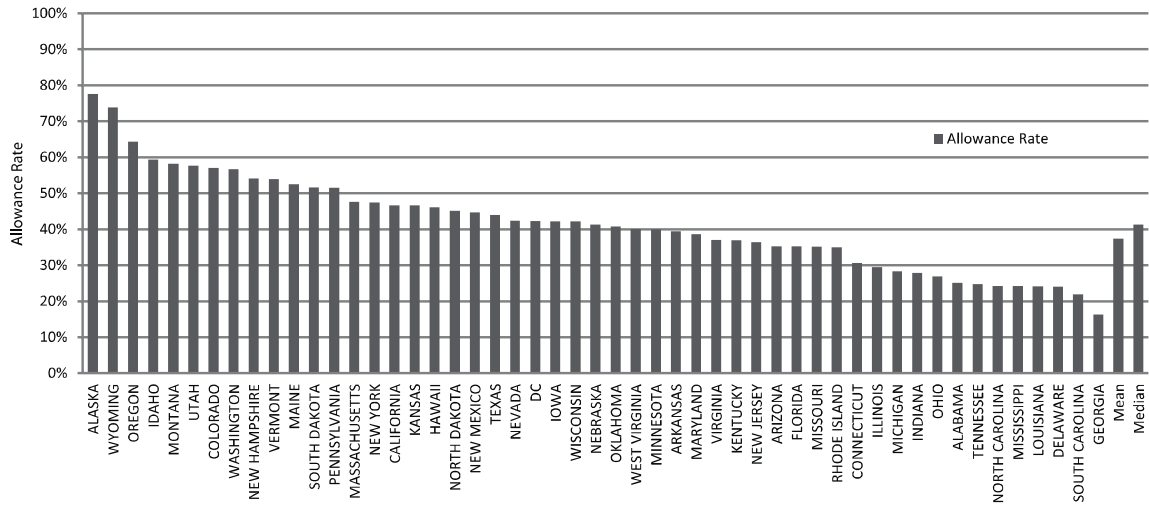

**Figure 4.** Percentages of children in low-income households in each state who are recipients of SSI benefits for the 10 selected mental disorders.  
 SOURCE: Unpublished data set provided by the SSA.

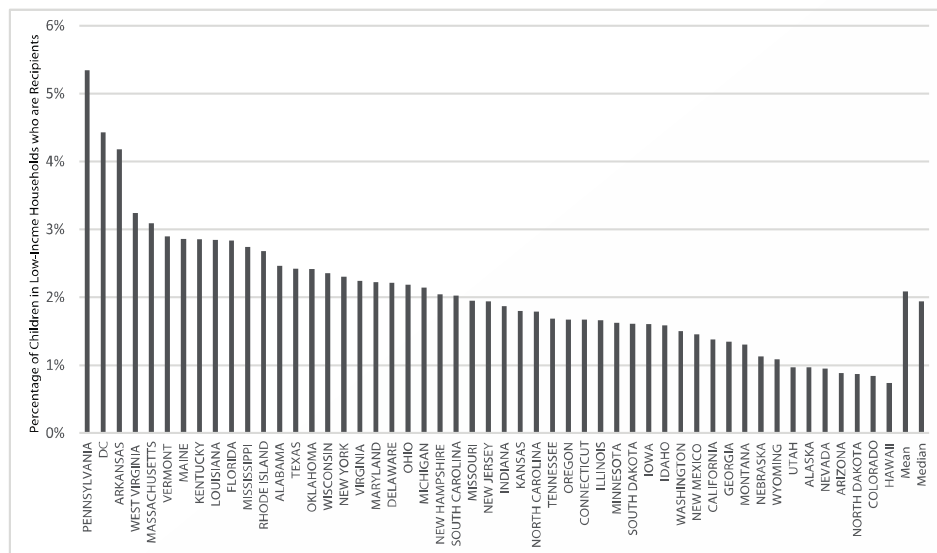

**Figure 5.** Numbers of recipients for the 10 selected mental disorders in 2013, by state. SOURCE: Unpublished data set provided by the SSA.

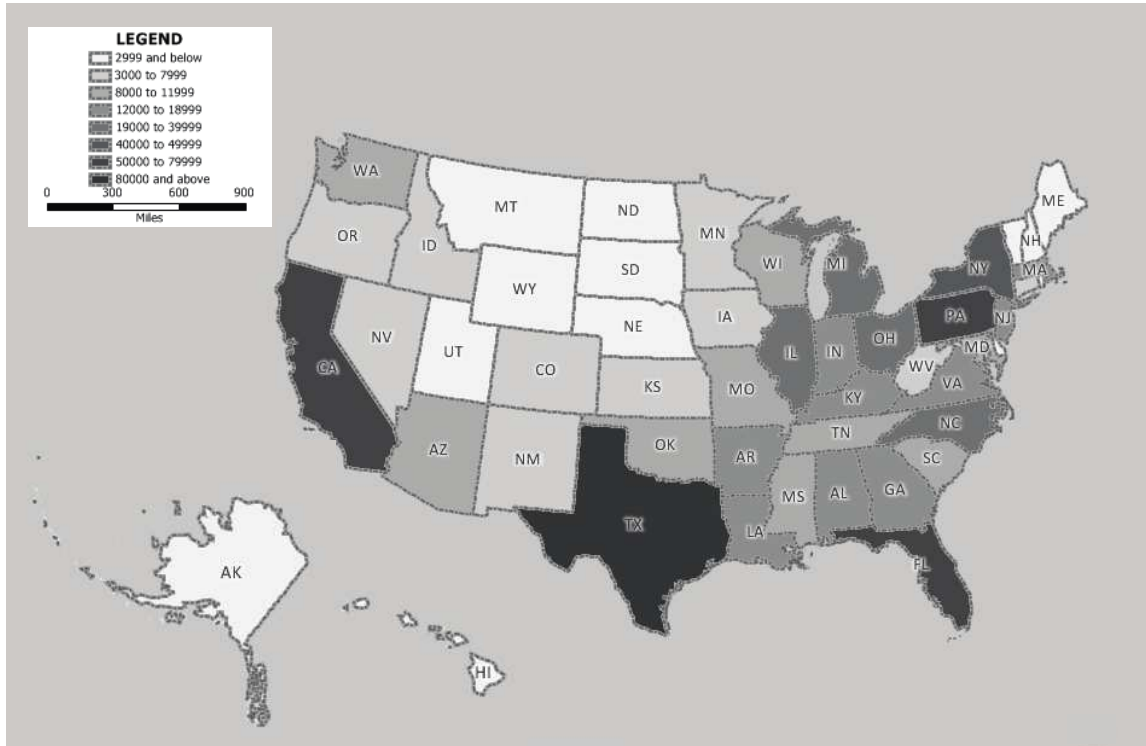

**Figure 6.** Percent change in rate of determinations among children in households below 200 percent of the federal poverty level, by state, from 2004 to 2013.

NOTE: The Current Population Survey table creator was used to generate numbers of children below 200 percent of the federal poverty level. Parameters used to generate the numbers include get count of: persons in poverty universe (everyone except unrelated individuals under 15); years: 2004 to 2013; Census 2010 weights; row variable: age; column variable: income-to-poverty ratio; and customized formatting: income-to-poverty ratio percent cutoff of 200 percent. SOURCES: U.S. Census Bureau, 2015; unpublished data set provided by the SSA.

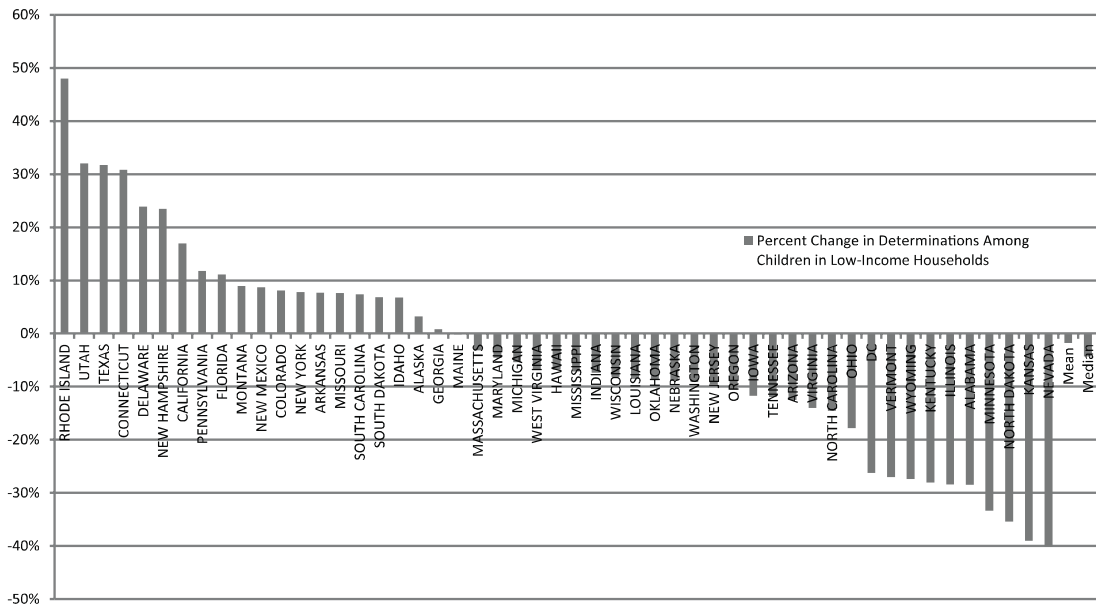

Supplement: appi.ps.201600118.ds001.pdf [file appi.ps.201600118.ds001.pdf]
